# Supplementary material for: Total synthesis of phenanthroindolizidine alkaloids via asymmetric deprotonation of N-Boc-pyrrolidine
Source: Royal Society of Chemistry journal article supplement (doi:10.1039/c3ra47465h), 2014-01-01
Supplement: c3ra47465h.pdf [file c3ra47465h.pdf]

**Supplementary Material (ESI) for RSC Advances**

**This journal is © The Royal Society of Chemistry 2013**

**Total Synthesis of Phenanthroindolizidine Alkaloids via Asymmetric  
Deprotonation of *N*-Boc-pyrrolidine**

**Meng Deng, Bo Su, Hui Zhang, Yuxiu Liu, and Qingmin Wang\***

*State Key Laboratory of Elemento-Organic Chemistry, Research Institute of Elemento-Organic Chemistry, Nankai  
University, Collaborative Innovation Center of Chemical Science and Engineering(Tianjin), Tianjin 300071,  
People's Republic of China  
wang98h@263.net; wangqm@nankai.edu.cn*

**Table of contents**

|               |     |
|---------------|-----|
| 1.NMR spectra | S2  |
| 2.HRMS data   | S9  |
| 3.HPLC data   | S12 |

### NMR spectra (400 MHz, CDCl<sub>3</sub>, 25 °C)

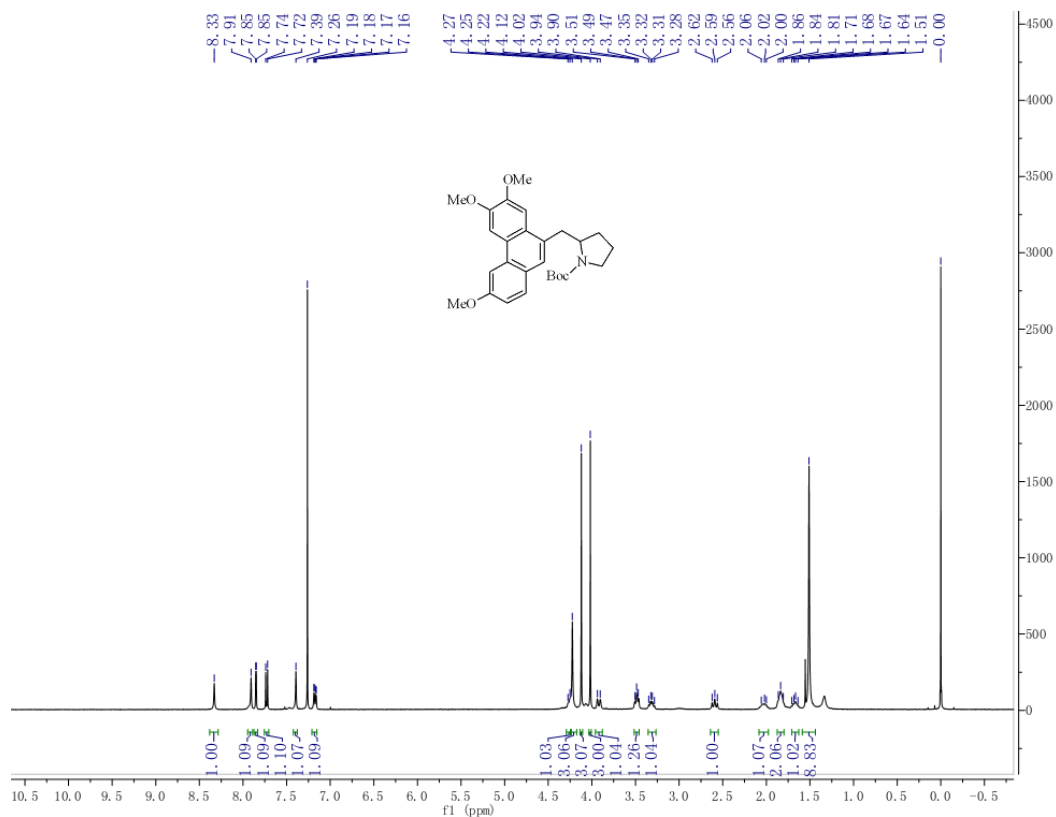

**<sup>1</sup>H NMR of compound 5**

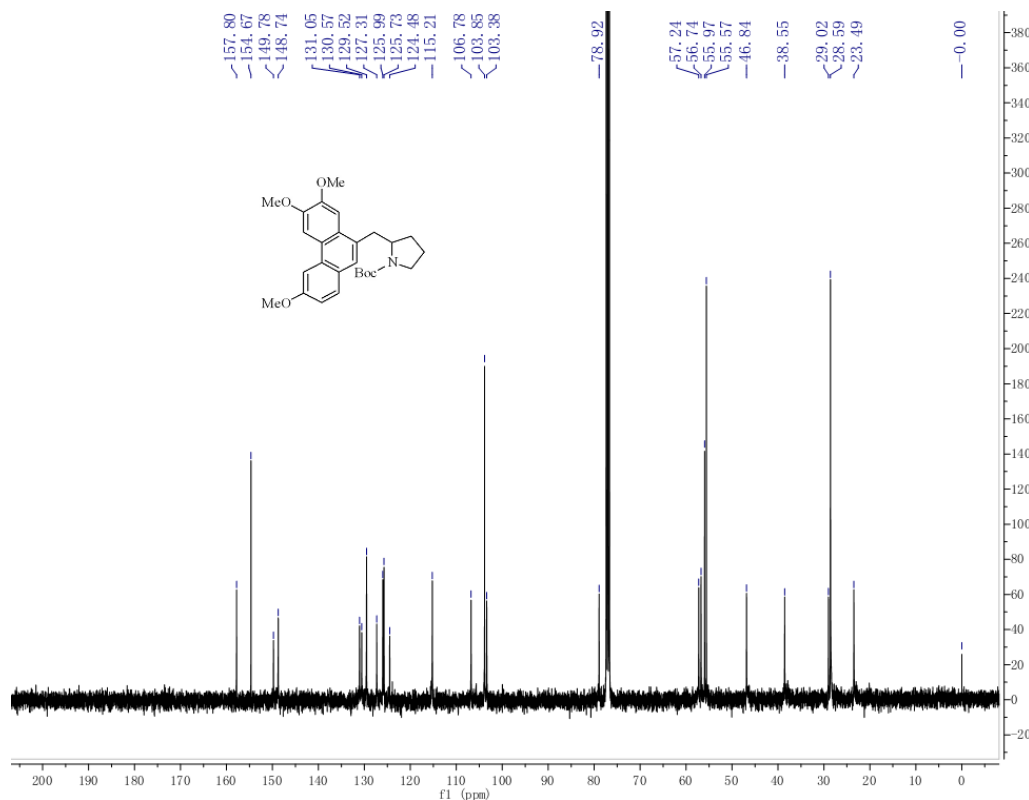

**<sup>13</sup>C NMR of compound 5**

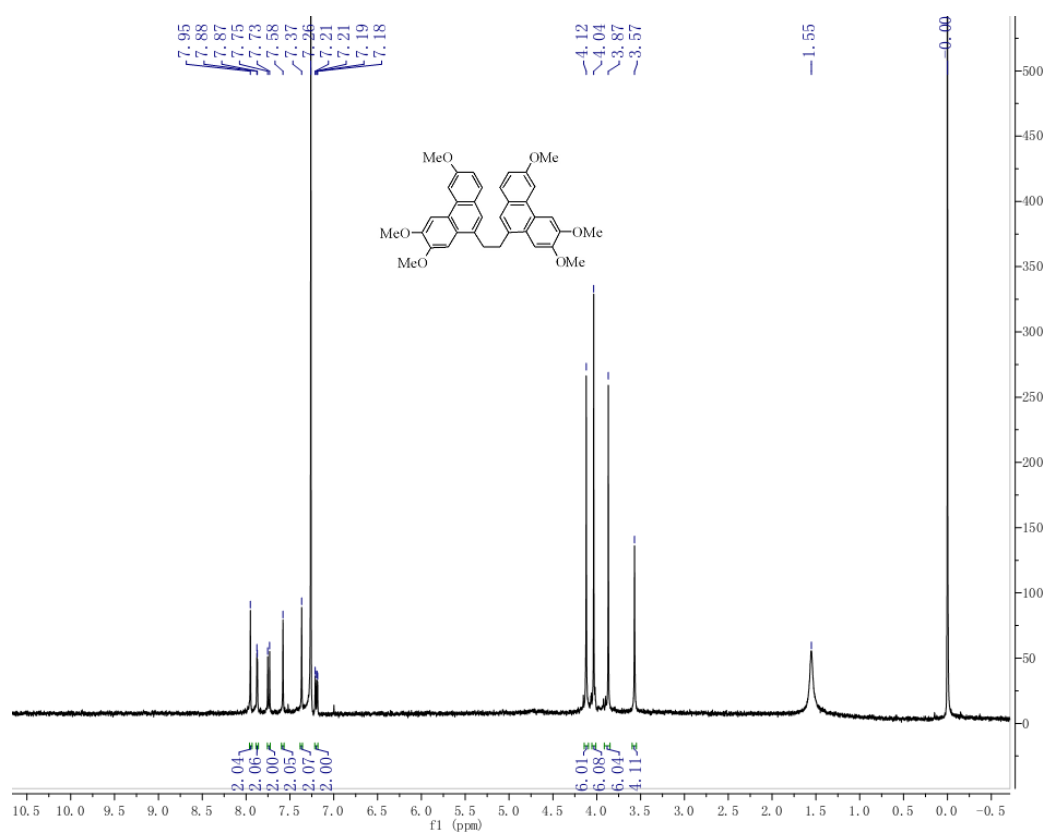

<sup>1</sup>H NMR of compound 5a

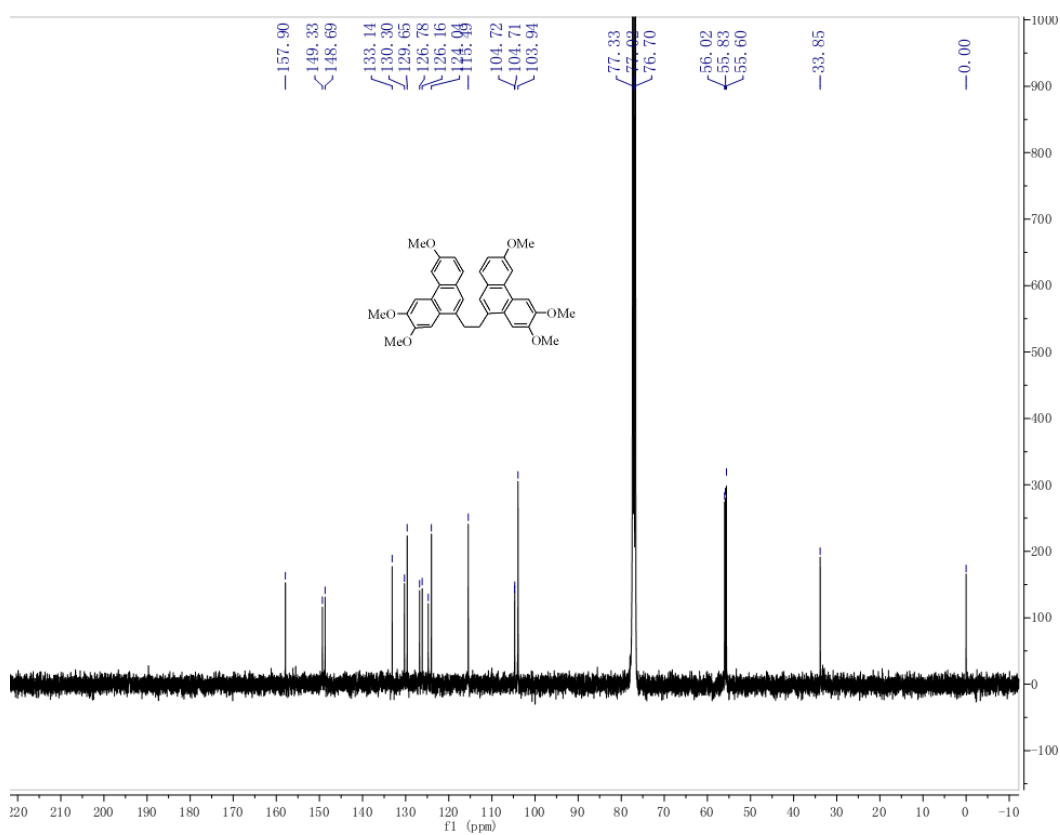

<sup>13</sup>C NMR of compound 5a

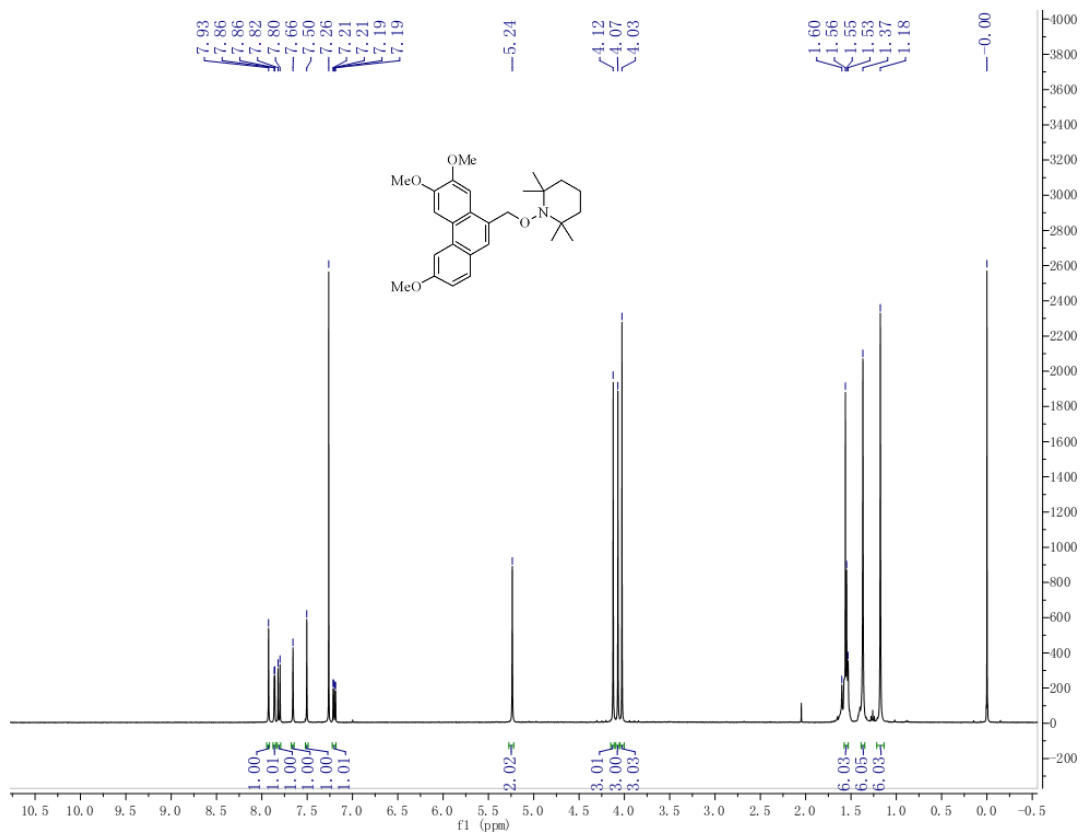

**<sup>1</sup>H NMR of compound 4c**

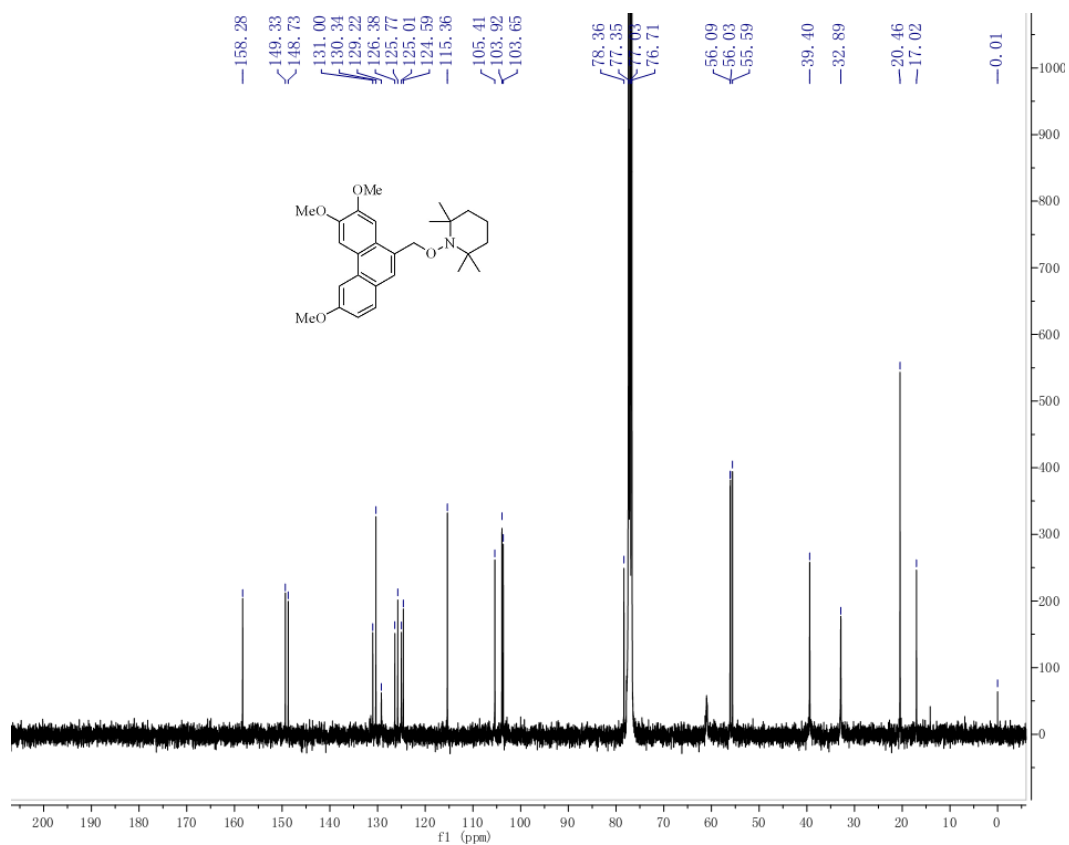

**<sup>13</sup>C NMR of compound 4c**

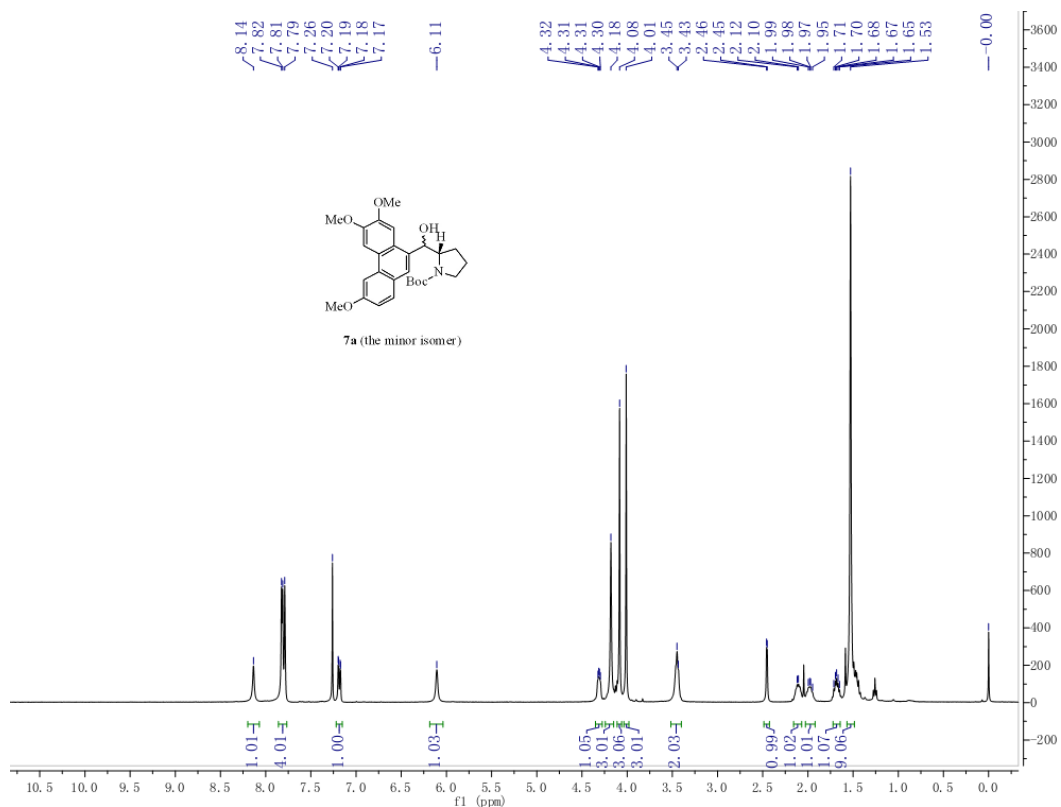

<sup>1</sup>H NMR of compound 7a

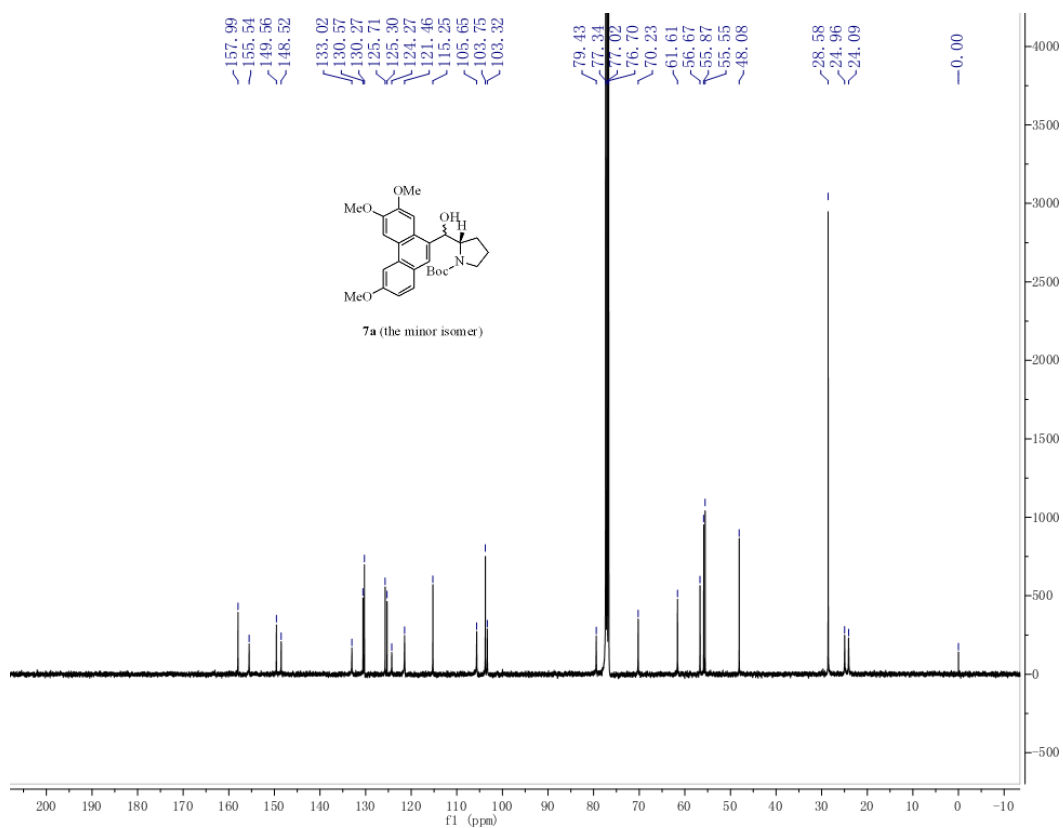

<sup>13</sup>C NMR of compound 7a

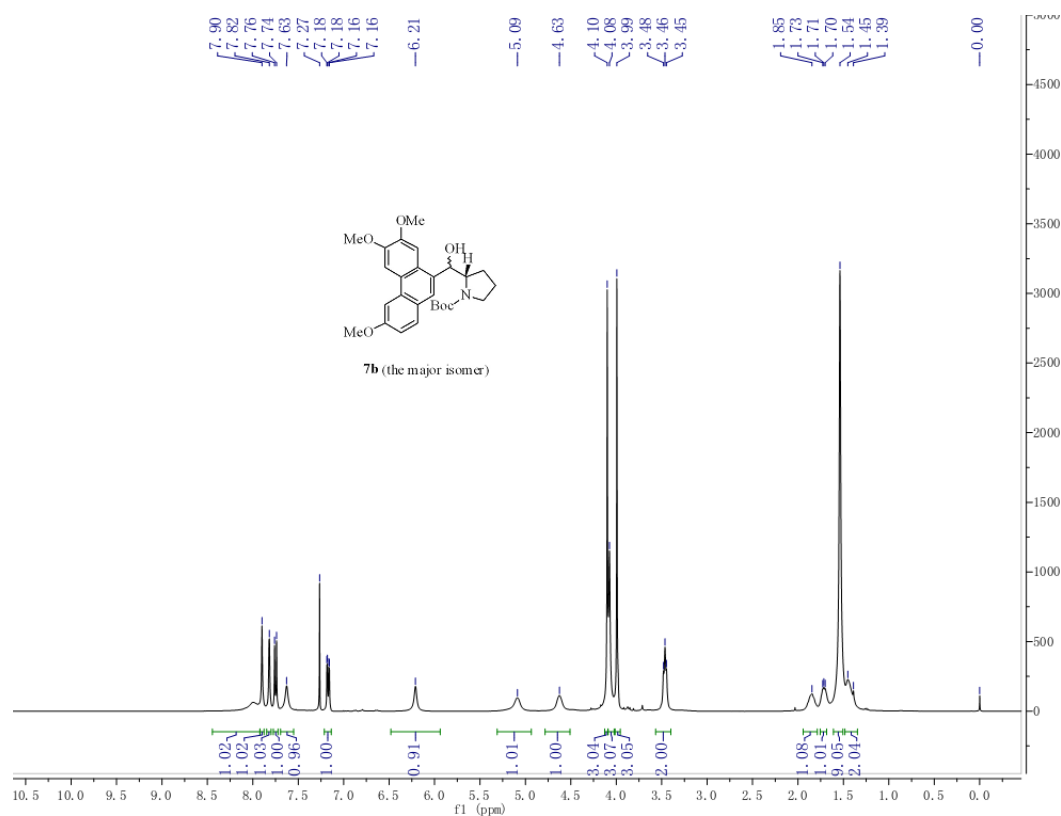

**<sup>1</sup>H NMR of compound 7b**

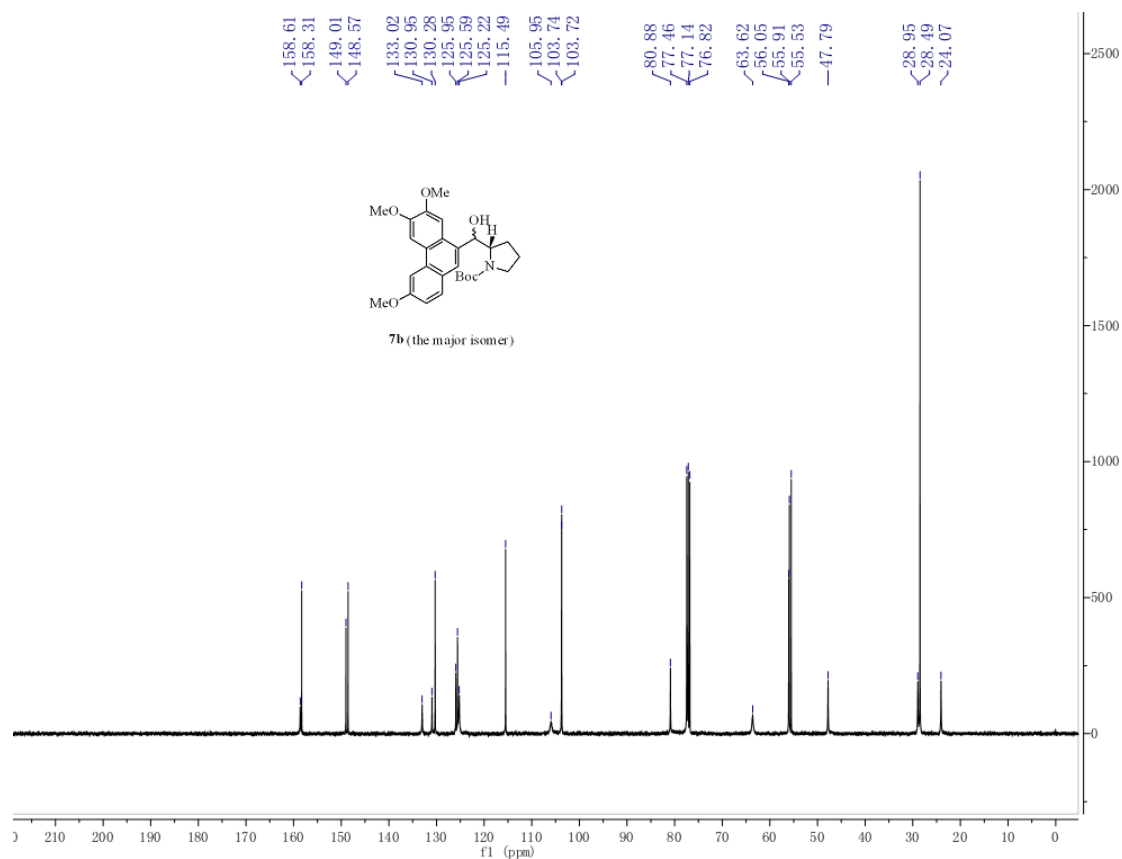

**<sup>13</sup>C NMR of compound 7b**

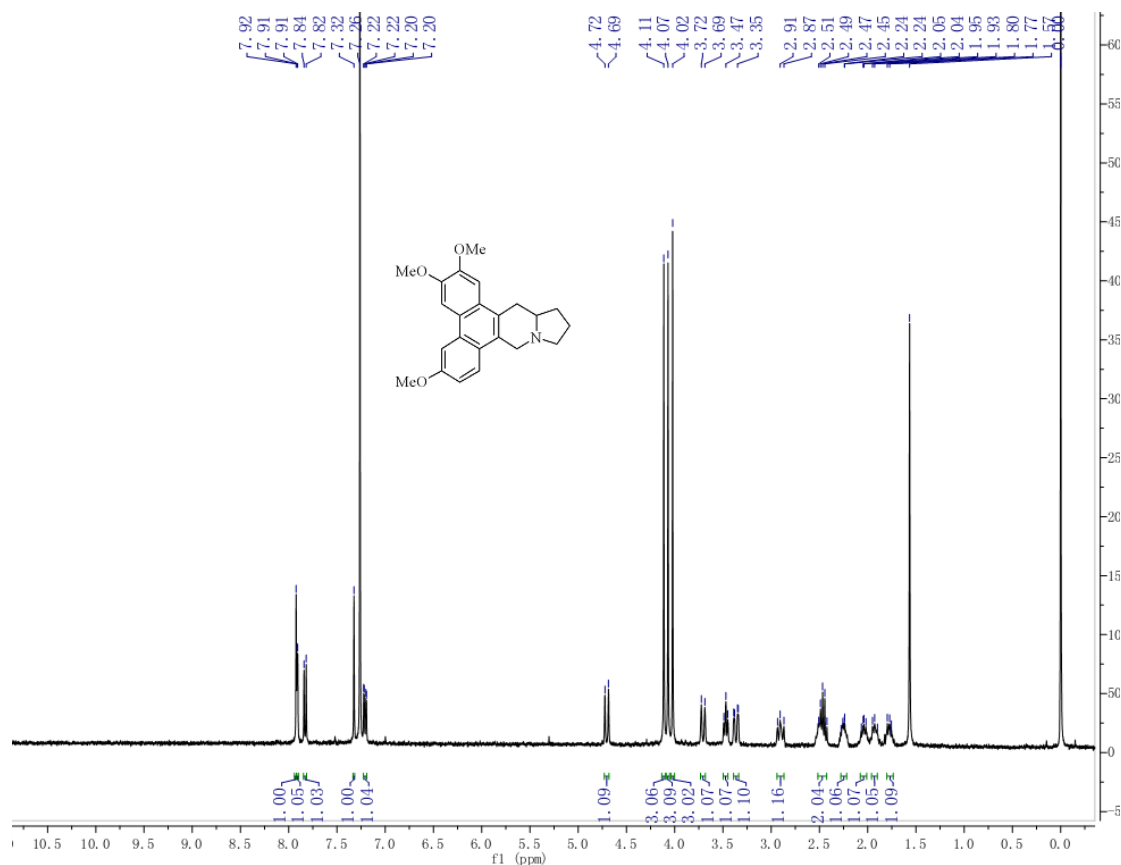

<sup>1</sup>H NMR of compound 1a

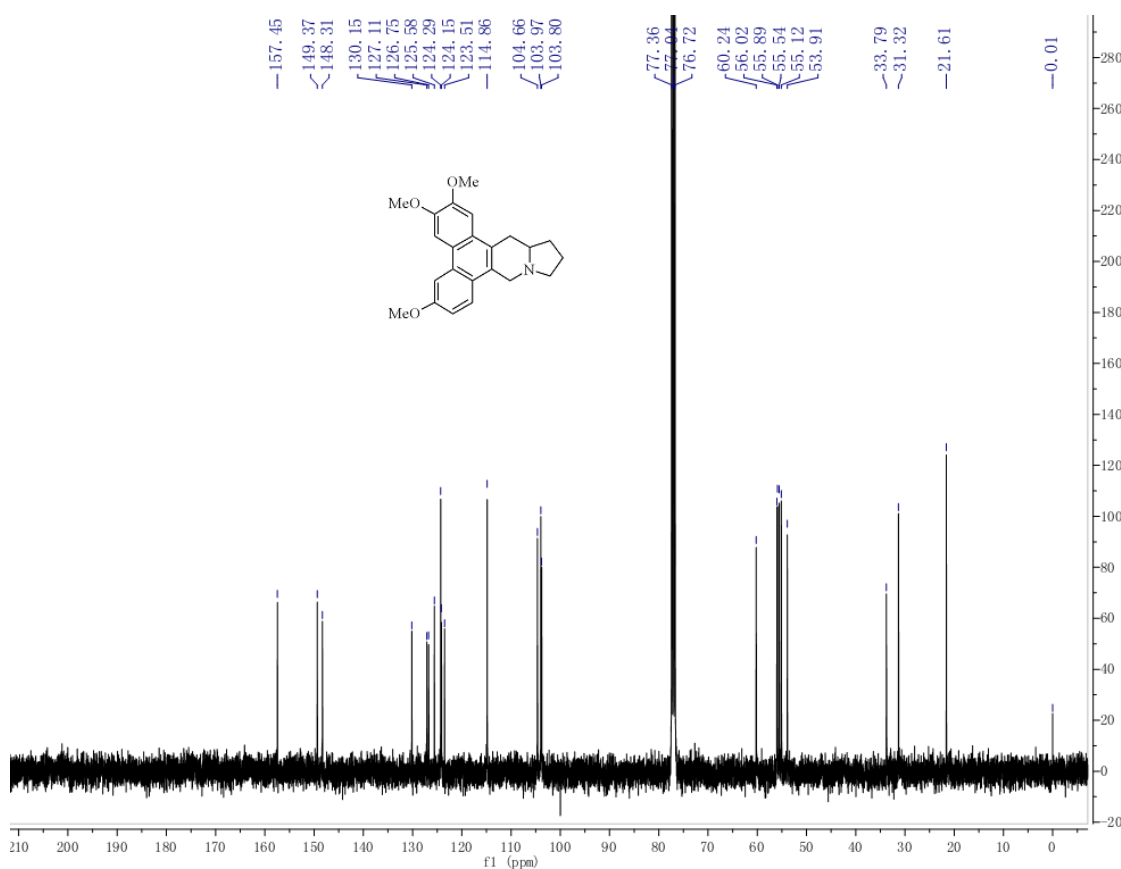

<sup>13</sup>C NMR of compound 1a

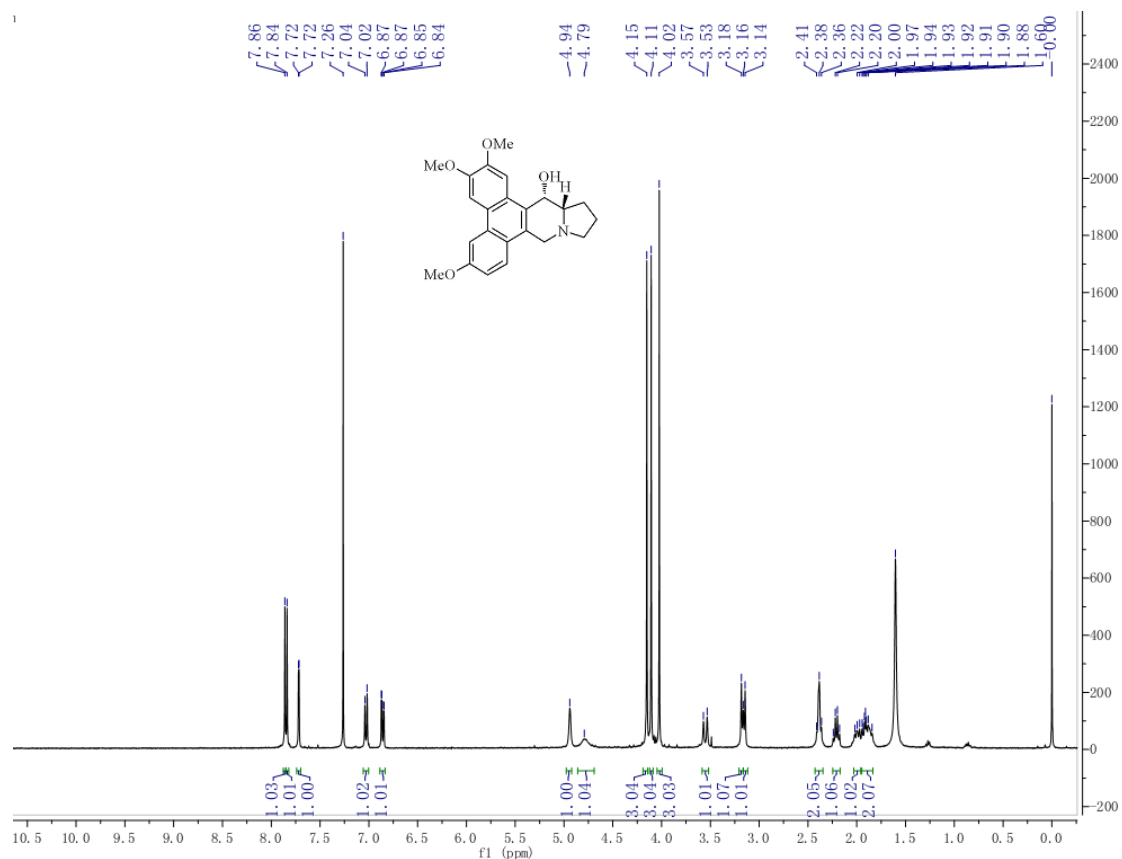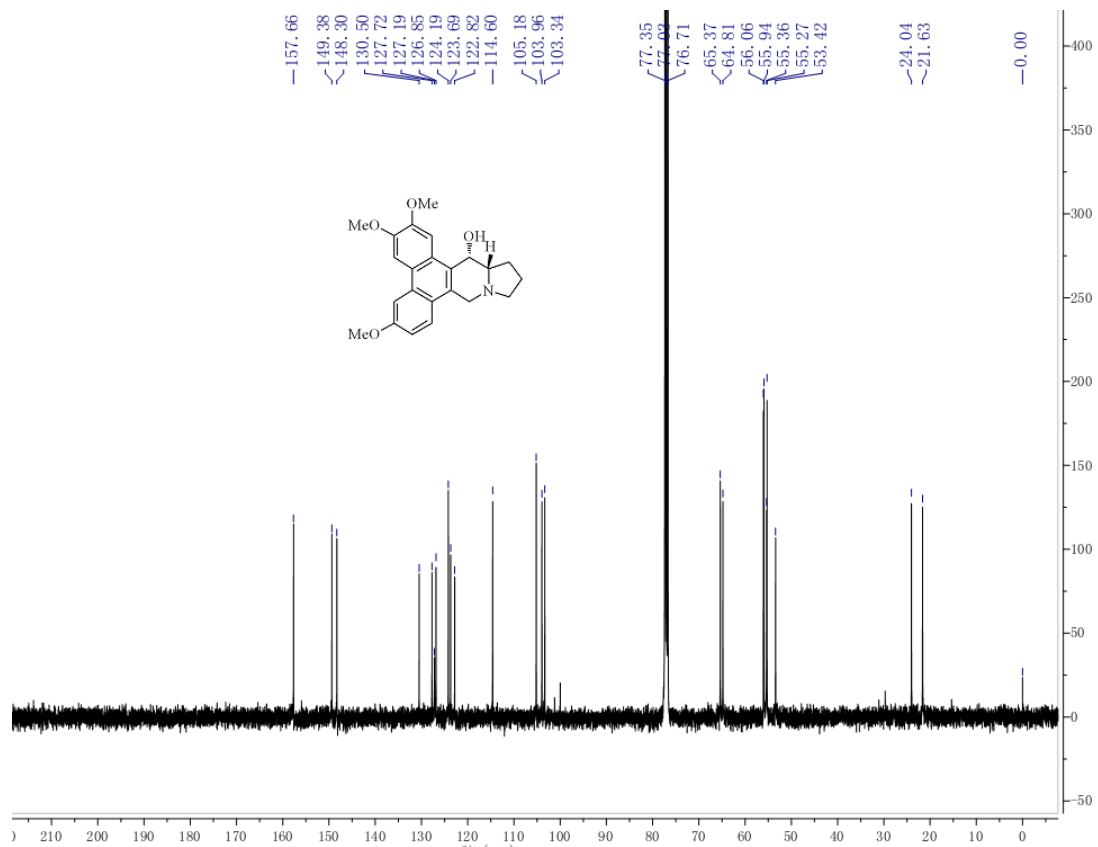



## Copies of HRMS (ESI)

|               |             |             |           |                 |              |                        |                      |
|---------------|-------------|-------------|-----------|-----------------|--------------|------------------------|----------------------|
| Sample Name   | lc/ms       | Position    | P1-A1     | Instrument Name | Instrument 1 | User Name              |                      |
| Inj Vol       | 2           | InjPosition |           | SampleType      | Sample       | IRM Calibration Status | Some Ions Missed     |
| Data Filename | DM12-17-1.d | ACQ Method  | chen-ms.m | Comment         |              | Acquired Time          | 8/14/2013 9:08:55 AM |

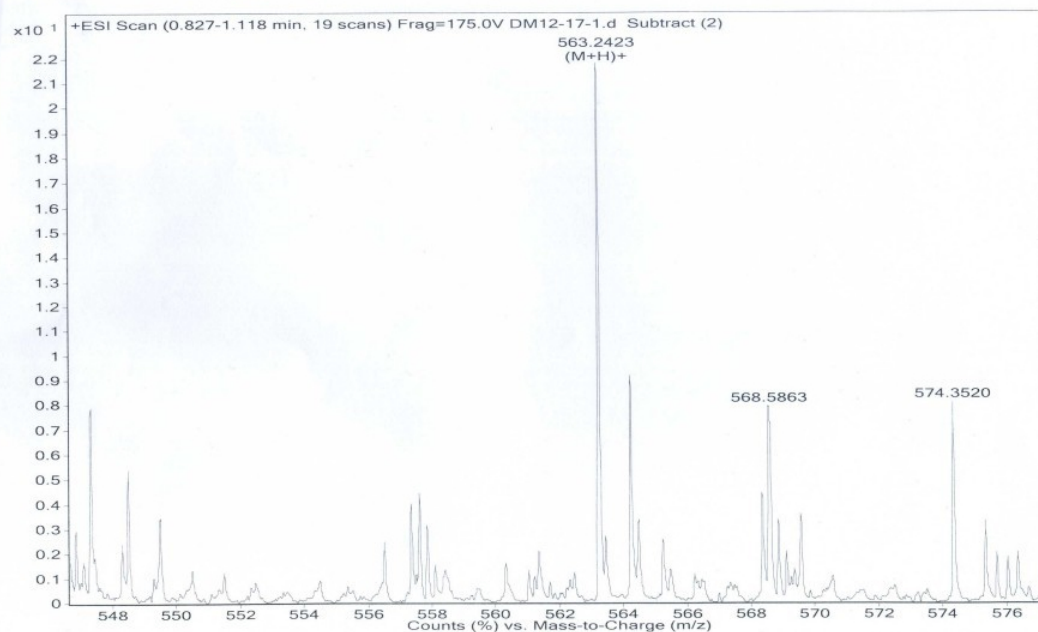

## HRMS of compound 5a

|               |              |             |           |                 |              |                        |                       |
|---------------|--------------|-------------|-----------|-----------------|--------------|------------------------|-----------------------|
| Sample Name   | lc/ms        | Position    | P1-A7     | Instrument Name | Instrument 1 | User Name              |                       |
| Inj Vol       | 2            | InjPosition |           | SampleType      | Sample       | IRM Calibration Status | Some Ions Missed      |
| Data Filename | DM15-43-31.d | ACQ Method  | chen-ms.m | Comment         |              | Acquired Time          | 8/30/2013 11:48:32 AM |

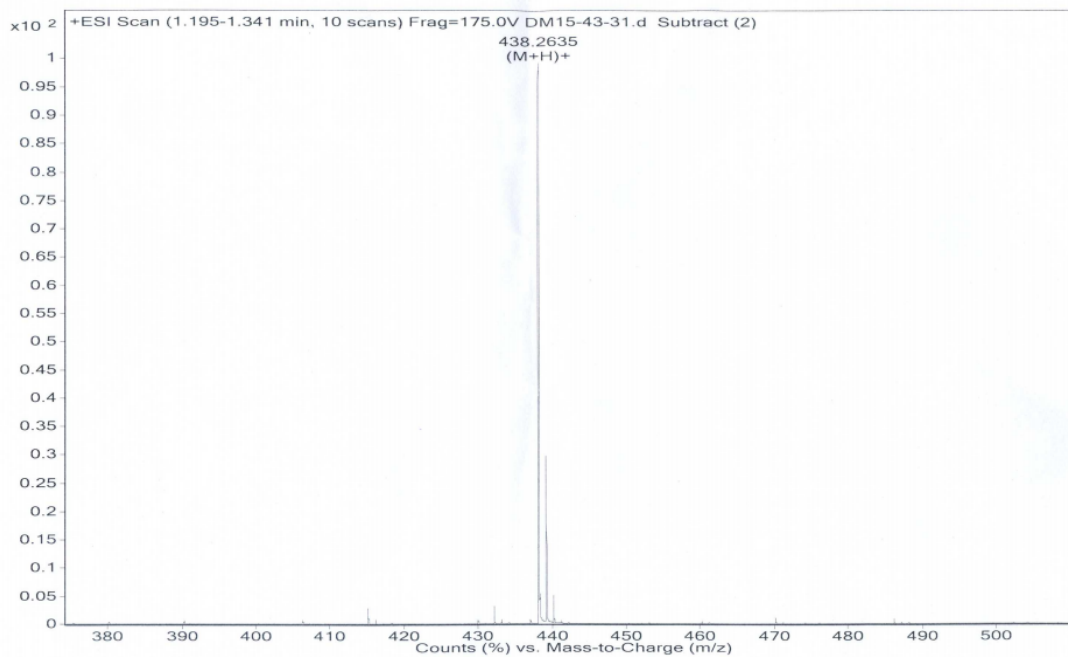

## HRMS of compound 4c

|               |             |             |           |                 |              |                        |                      |
|---------------|-------------|-------------|-----------|-----------------|--------------|------------------------|----------------------|
| Sample Name   | LC/MS       | Position    | P1-A3     | Instrument Name | Instrument 1 | User Name              |                      |
| Inj Vol       | 3           | InjPosition |           | SampleType      | Sample       | IRM Calibration Status | Some Ions Missed     |
| Data Filename | DM11-48-1.d | ACQ Method  | chen-ms.m | Comment         |              | Acquired Time          | 3/1/2013 11:52:35 AM |

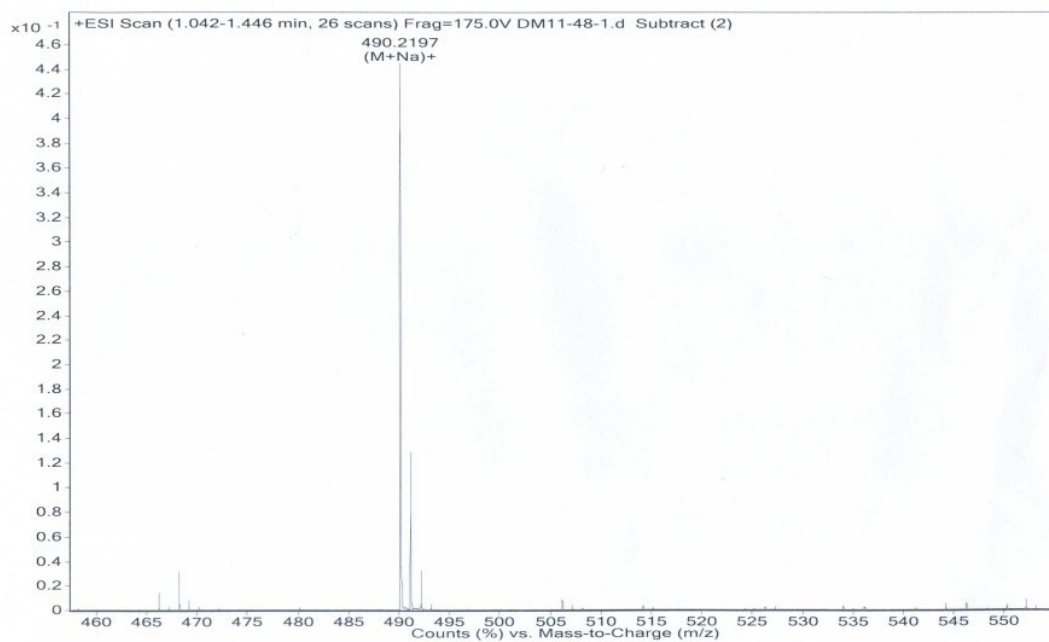

### HRMS of compound 7a

|               |             |             |           |                 |              |                        |                      |
|---------------|-------------|-------------|-----------|-----------------|--------------|------------------------|----------------------|
| Sample Name   | LC/MS       | Position    | P1-A4     | Instrument Name | Instrument 1 | User Name              |                      |
| Inj Vol       | 3           | InjPosition |           | SampleType      | Sample       | IRM Calibration Status | Some Ions Missed     |
| Data Filename | DM11-48-2.d | ACQ Method  | chen-ms.m | Comment         |              | Acquired Time          | 3/1/2013 11:56:25 AM |

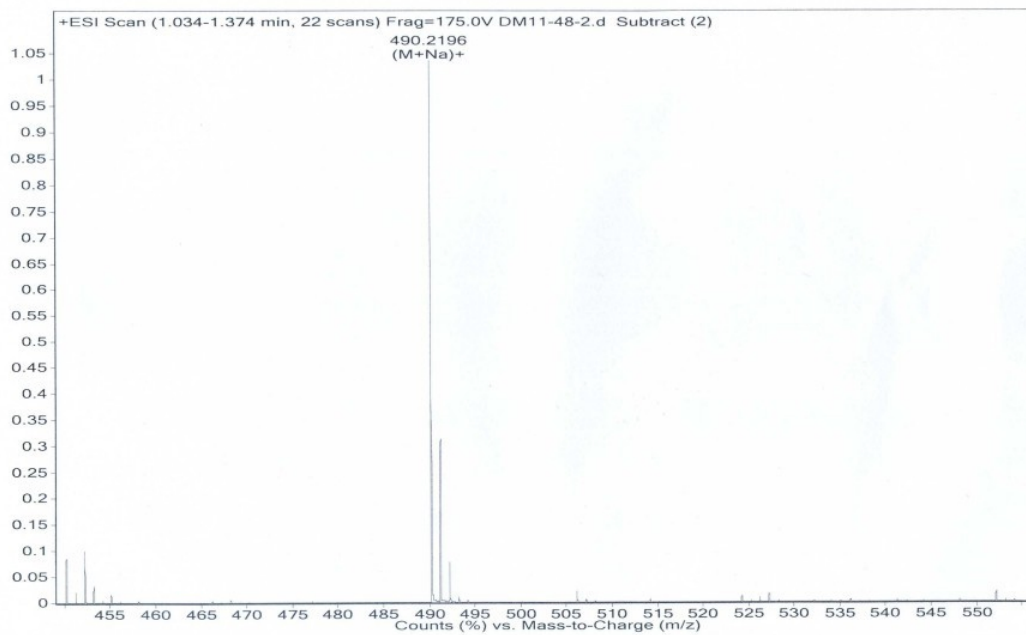

### HRMS of compound 7b

|               |             |             |           |                 |              |                        |                      |
|---------------|-------------|-------------|-----------|-----------------|--------------|------------------------|----------------------|
| Sample Name   | lc/ms       | Position    | P1-A4     | Instrument Name | Instrument 1 | User Name              |                      |
| Inj Vol       | 2           | InjPosition |           | SampleType      | Sample       | IRM Calibration Status | Some Ions Missed     |
| Data Filename | DM15-16-1.d | ACQ Method  | chen-ms.m | Comment         |              | Acquired Time          | 7/17/2013 1:03:14 PM |

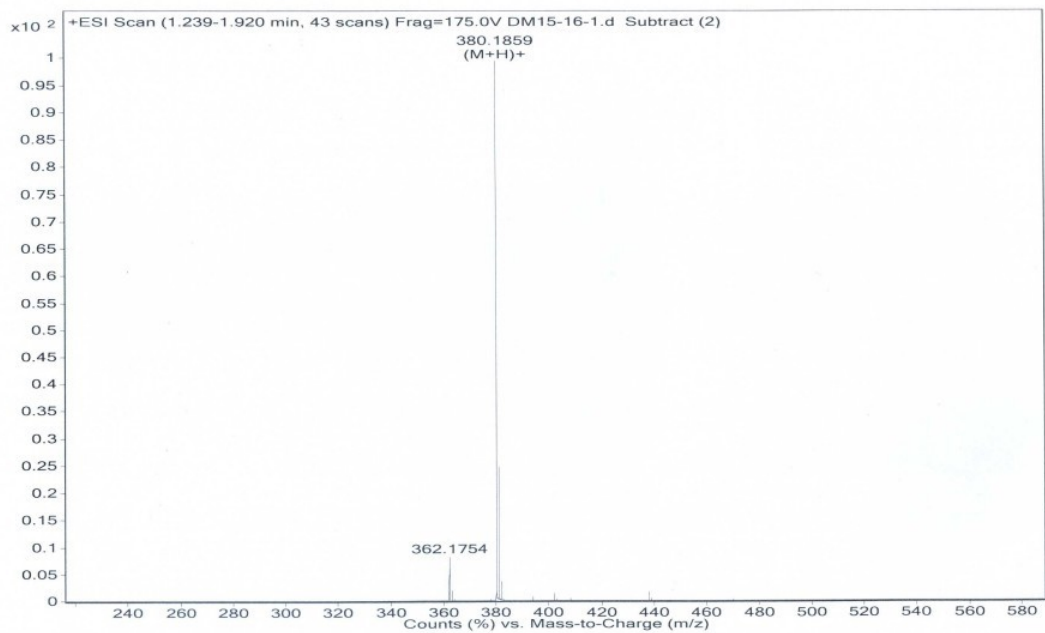

## HRMS of compound 2

## Chiral-HPLC chromatogram

The enantiomeric excesses of (+)-**5** and racemic **5** were determined by HPLC with a Chiralcel AD-H column using Agilent 1100 instrument.

Conditions:

wave length: 254 nm

flow rate: 1.0 mL/ min

mobile phase: i-PrOH : hexane = 10:90

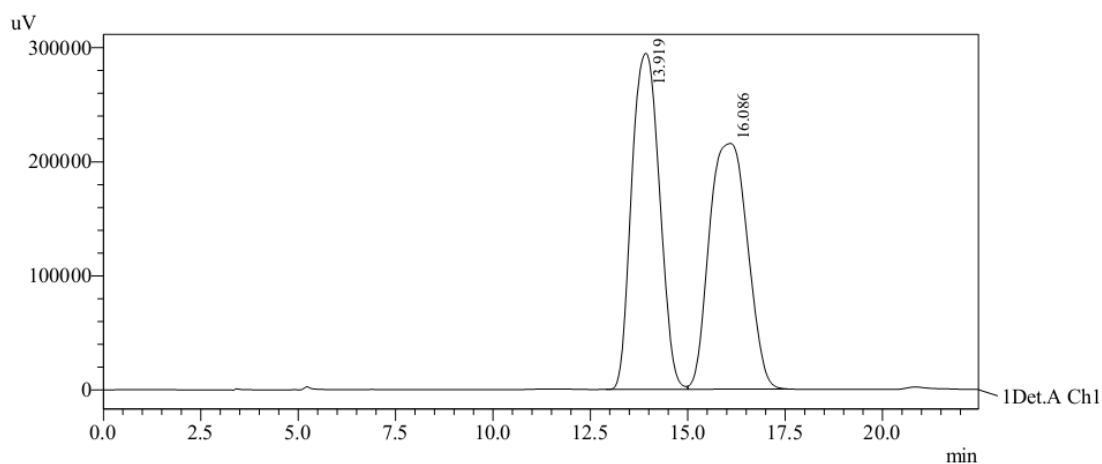

1 Det.A Ch1 / 254nm

PeakTable

Detector A Ch1 254nm

| Peak# | Ret. Time | Area     | Height | Area %  | Height % |
|-------|-----------|----------|--------|---------|----------|
| 1     | 13.919    | 14685487 | 294591 | 49.963  | 57.781   |
| 2     | 16.086    | 14707168 | 215251 | 50.037  | 42.219   |
| Total |           | 29392656 | 509842 | 100.000 | 100.000  |

## HPLC chromatogram of racemic **5**

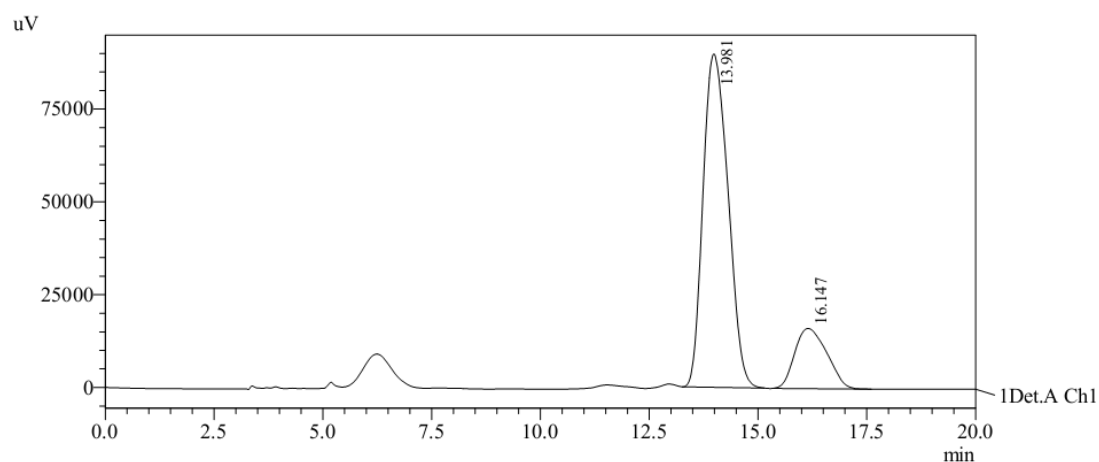

1 Det.A Ch1 / 254nm

PeakTable

Detector A Ch1 254nm

| Peak# | Ret. Time | Area    | Height | Area %  | Height % |
|-------|-----------|---------|--------|---------|----------|
| 1     | 13.981    | 3596305 | 89826  | 81.222  | 84.711   |
| 2     | 16.147    | 831453  | 16213  | 18.778  | 15.289   |
| Total |           | 4427758 | 106039 | 100.000 | 100.000  |

## HPLC chromatogram of (+)-**5** (Table 1, Entry 3)

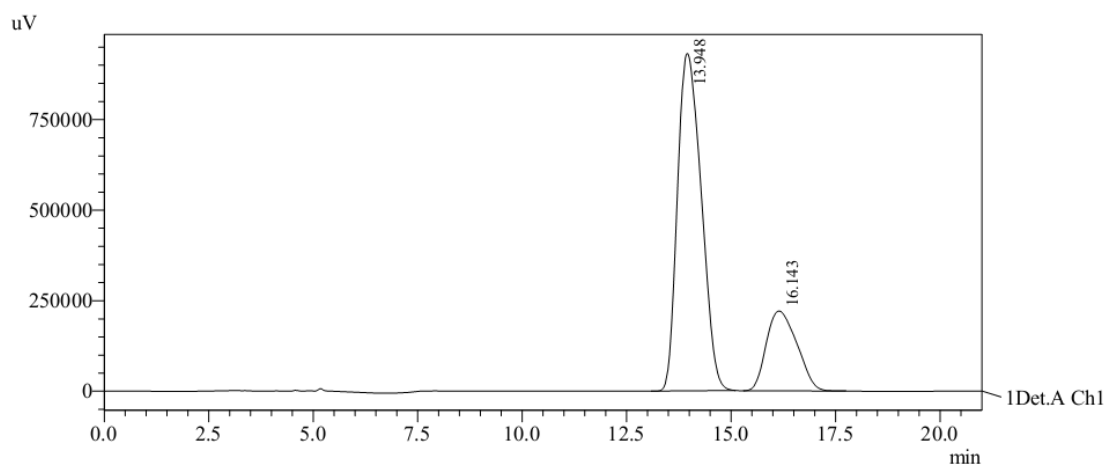

1 Det.A Ch1 / 254nm

PeakTable

Detector A Ch1 254nm

| Peak# | Ret. Time | Area     | Height  | Area %  | Height % |
|-------|-----------|----------|---------|---------|----------|
| 1     | 13.948    | 37055412 | 931789  | 76.735  | 80.867   |
| 2     | 16.143    | 11234992 | 220457  | 23.265  | 19.133   |
| Total |           | 48290404 | 1152245 | 100.000 | 100.000  |

### HPLC chromatogram of (+)-5 (Table 1, Entry 4)

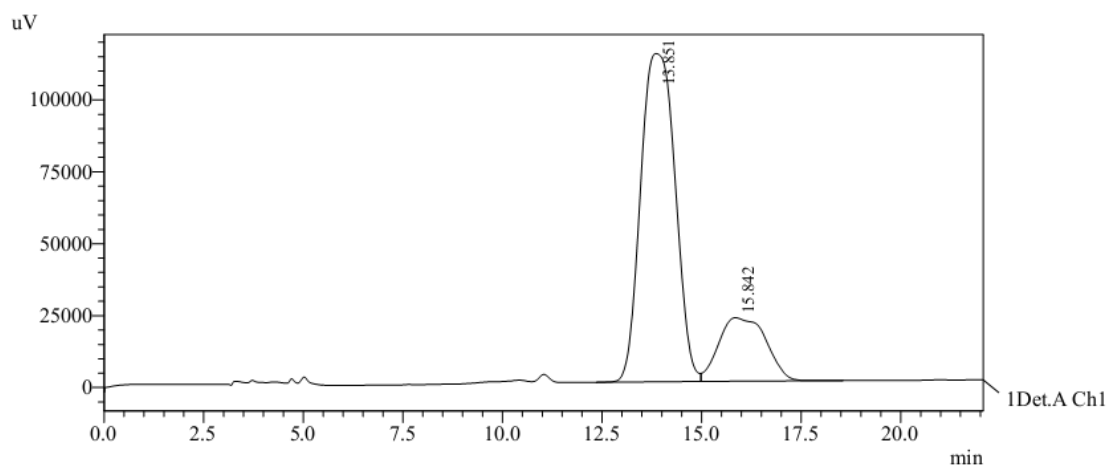

1 Det.A Ch1 / 254nm

PeakTable

Detector A Ch1 254nm

| Peak# | Ret. Time | Area    | Height | Area %  | Height % |
|-------|-----------|---------|--------|---------|----------|
| 1     | 13.851    | 6879961 | 114103 | 79.064  | 83.763   |
| 2     | 15.842    | 1821846 | 22118  | 20.936  | 16.237   |
| Total |           | 8701806 | 136221 | 100.000 | 100.000  |

### HPLC chromatogram of (+)-5 (Table 1, Entry 5)

The enantiomeric excesses of **2** and racemic **2** were determined by HPLC with a Phenomenex Lux Cellulose-1 column using Agilent 1100 instrument.

**Conditions:**

**wave length: 254 nm**

**flow rate: 1.0 mL/ min**

**mobile phase: i-PrOH: CH<sub>3</sub>CN(0.1% Et<sub>3</sub>N) = 5:95**

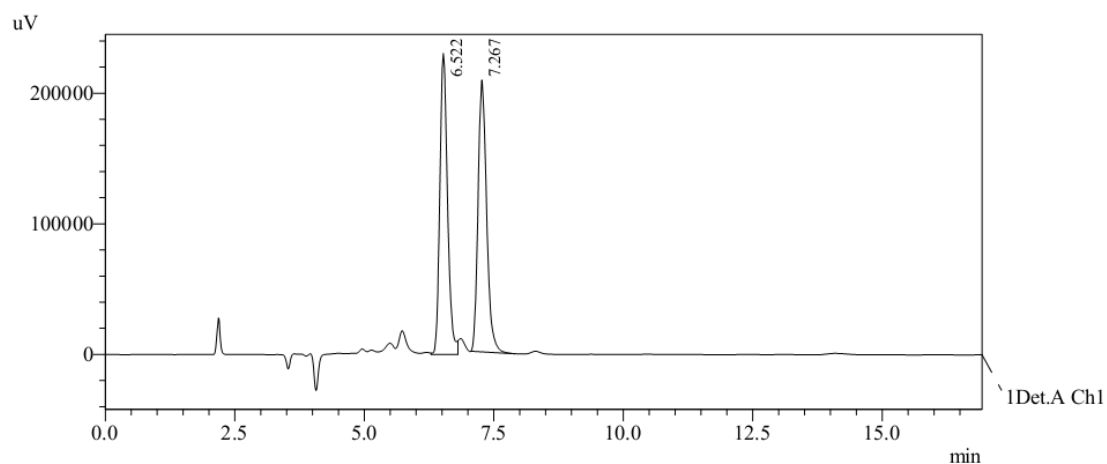

1 Det.A Ch1 / 254nm

PeakTable

| Peak# | Ret. Time | Area    | Height | Area %  | Height % |
|-------|-----------|---------|--------|---------|----------|
| 1     | 6.522     | 2378666 | 230634 | 49.813  | 52.575   |
| 2     | 7.267     | 2396478 | 208044 | 50.187  | 47.425   |
| Total |           | 4775144 | 438678 | 100.000 | 100.000  |

### HPLC chromatogram of racemic 2

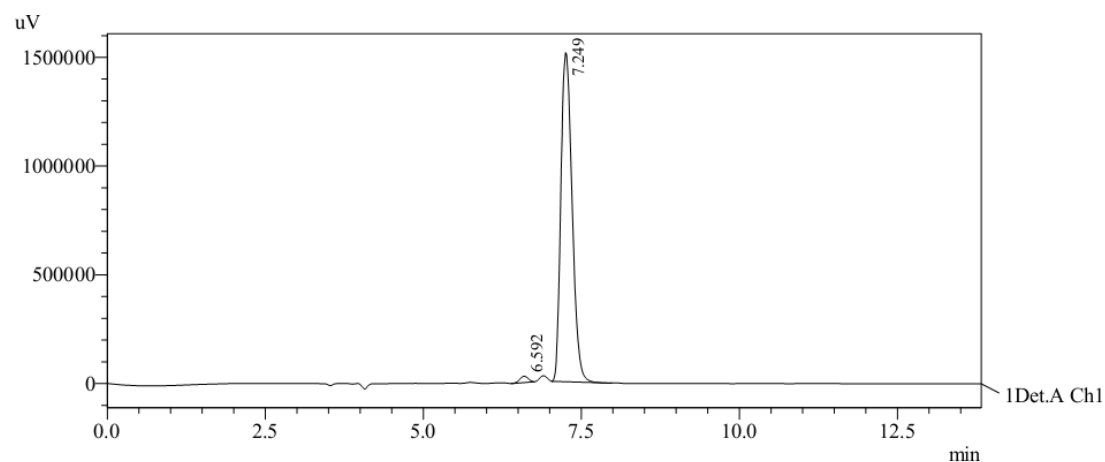

1 Det.A Ch1 / 254nm

PeakTable

| Peak# | Ret. Time | Area     | Height  | Area %  | Height % |
|-------|-----------|----------|---------|---------|----------|
| 1     | 6.592     | 281123   | 29584   | 1.480   | 1.917    |
| 2     | 7.249     | 18708501 | 1513497 | 98.520  | 98.083   |
| Total |           | 18989624 | 1543081 | 100.000 | 100.000  |

### HPLC chromatogram of 2 (produced by 7a)

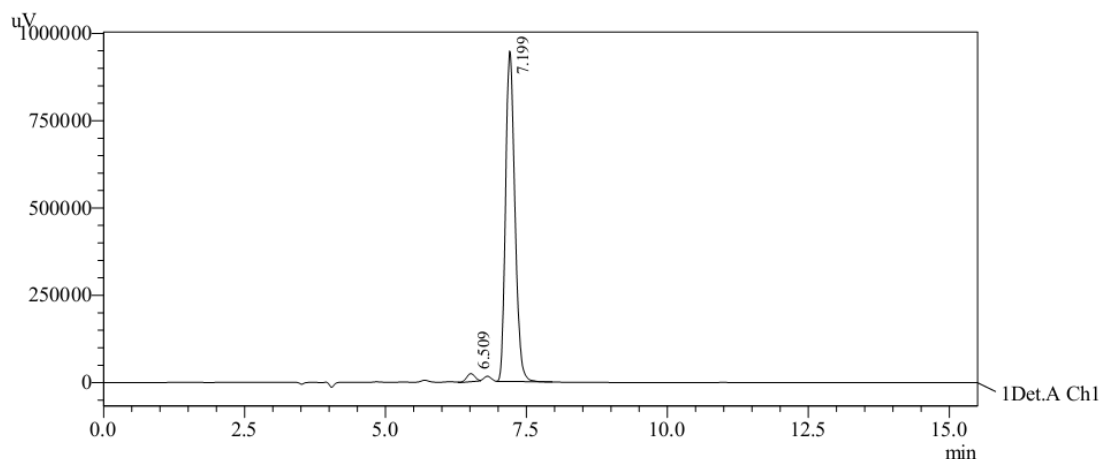

1 Det.A Ch1 / 254nm

PeakTable

Detector A Ch1 254nm

| Peak# | Ret. Time | Area     | Height | Area %  | Height % |
|-------|-----------|----------|--------|---------|----------|
| 1     | 6.509     | 243496   | 23273  | 2.191   | 2.399    |
| 2     | 7.199     | 10870780 | 946845 | 97.809  | 97.601   |
| Total |           | 11114276 | 970118 | 100.000 | 100.000  |

### HPLC chromatogram of 2 (produced by 7b)

The enantiomeric excesses of 1a and racemic 1a were determined by HPLC with a Chiralcel AD-H column using Agilent 1100 instrument.

**Conditions:**

**wave length: 254 nm**

**flow rate: 1.0 mL/ min**

**mobile phase: i-PrOH: hexane = 50:50**

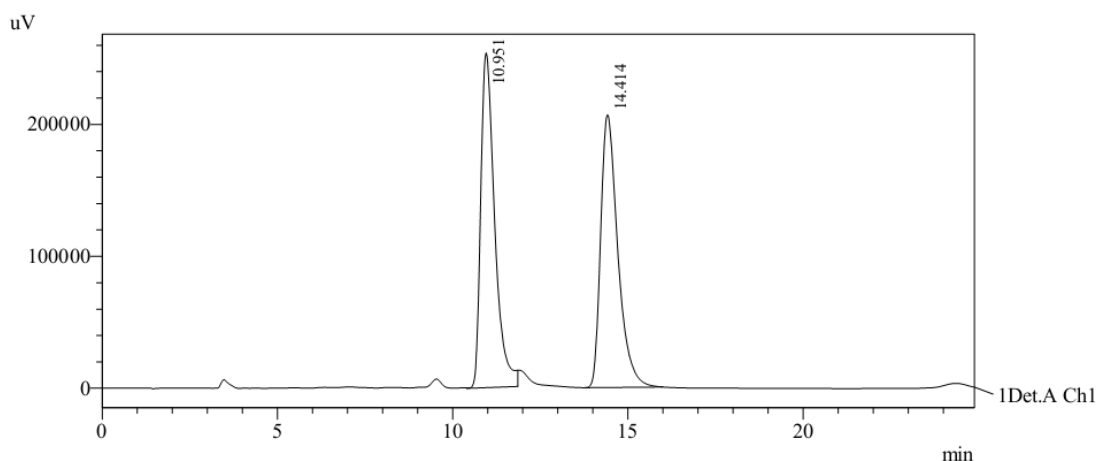

1 Det.A Ch1 / 254nm

PeakTable

Detector A Ch1 254nm

| Peak# | Ret. Time | Area     | Height | Area %  | Height % |
|-------|-----------|----------|--------|---------|----------|
| 1     | 10.951    | 7005371  | 253739 | 49.973  | 55.106   |
| 2     | 14.414    | 7012943  | 206715 | 50.027  | 44.894   |
| Total |           | 14018314 | 460454 | 100.000 | 100.000  |

### HPLC chromatogram of racemic 1a

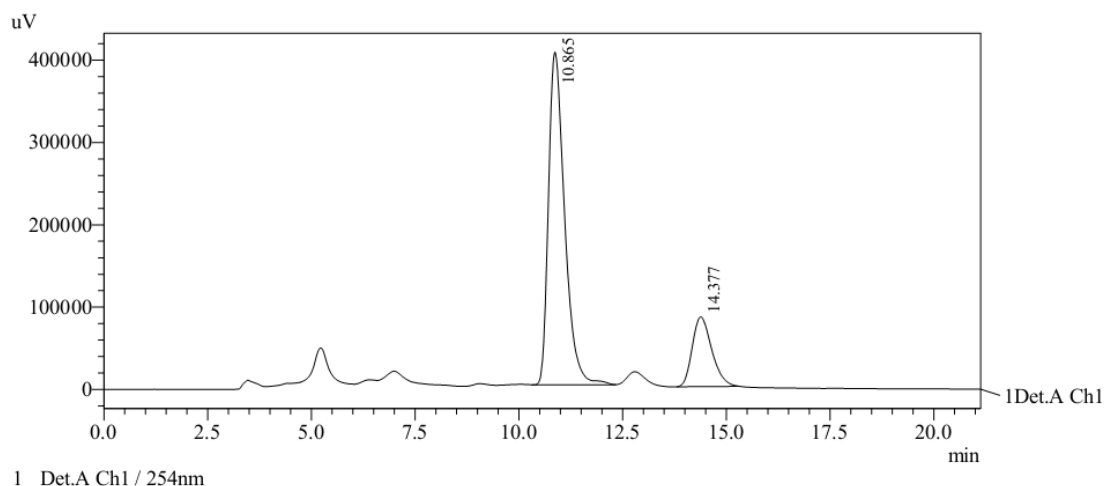

1 Det.A Ch1 / 254nm

PeakTable

Detector A Ch1 254nm

| Peak# | Ret. Time | Area     | Height | Area %  | Height % |
|-------|-----------|----------|--------|---------|----------|
| 1     | 10.865    | 10924037 | 404119 | 79.767  | 82.667   |
| 2     | 14.377    | 2770899  | 84731  | 20.233  | 17.333   |
| Total |           | 13694937 | 488850 | 100.000 | 100.000  |

### HPLC chromatogram of 1a [produced by 5 (Table 1, Entry 3)]

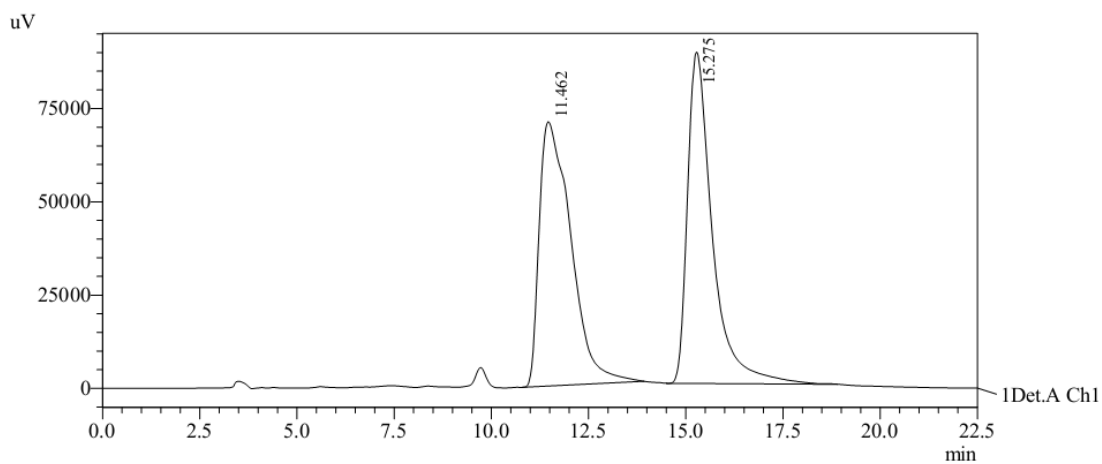

1 Det.A Ch1 / 254nm

PeakTable

Detector A Ch1 254nm

| Peak# | Ret. Time | Area    | Height | Area %  | Height % |
|-------|-----------|---------|--------|---------|----------|
| 1     | 11.462    | 4002097 | 70785  | 50.281  | 44.355   |
| 2     | 15.275    | 3957302 | 88803  | 49.719  | 55.645   |
| Total |           | 7959399 | 159588 | 100.000 | 100.000  |

### HPLC chromatogram of racemic 1a

(the drift in contrast with above HPLC chromatogram was due to different testing batches)



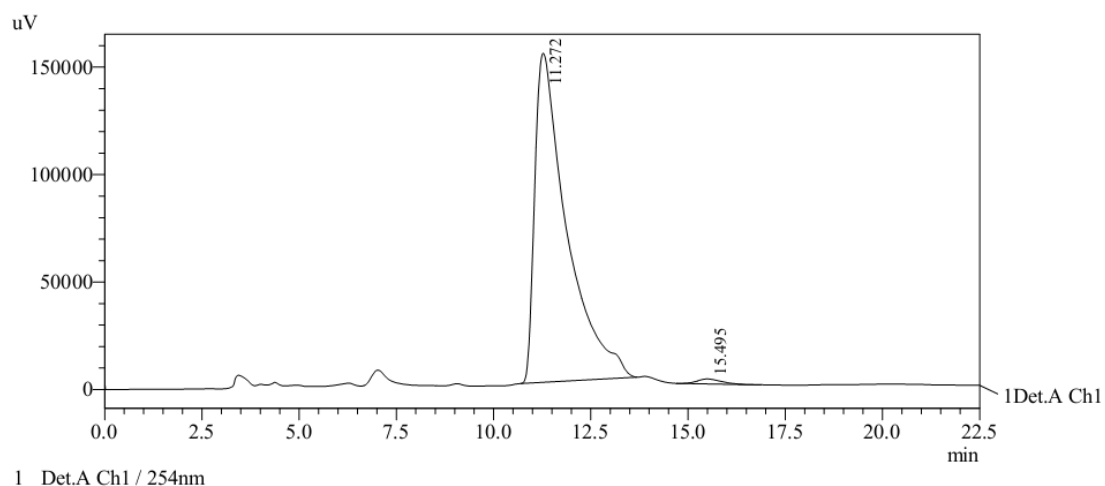

PeakTable

Detector A, Ch1 254nm

| Peak# | Ret. Time | Area    | Height | Area %  | Height % |
|-------|-----------|---------|--------|---------|----------|
| 1     | 11.272    | 8763385 | 153208 | 98.870  | 98.512   |
| 2     | 15.495    | 100185  | 2315   | 1.130   | 1.488    |
| Total |           | 8863570 | 155523 | 100.000 | 100.000  |

**HPLC chromatogram of 1a (produced by 2)**
